# Supplementary material for: Body mass index trends and its impact of under and overweight on outcome among PLHIV on antiretroviral treatment in rural Tanzania: A prospective cohort study
Source: PubMed Central journal article supplement (PMC10443839; doi:10.1371/journal.pone.0290445), 2023-08-22
Supplement: pone.0290445.s001.pdf [file pone.0290445.s001.pdf]

**S1 Table. Patients' characteristics at ART initiation by the availability of follow-up BMI measurements (numbers with their respective percentages)**

| Characteristics           | Follow-up BMI measurements available |             | P-value |
|---------------------------|--------------------------------------|-------------|---------|
|                           | No                                   | Yes         |         |
| Overall                   | 154 (7.2)                            | 1975 (92.8) |         |
| Sex                       |                                      |             |         |
| Male                      | 70 (45.5)                            | 810 (41.0)  | 0.28    |
| Female                    | 84 (54.6)                            | 1165 (59.0) |         |
| Age in years              |                                      |             |         |
| 19 - 34                   | 52 (33.8)                            | 579 (29.3)  | 0.50    |
| 35 - 44                   | 54 (35.1)                            | 725 (36.7)  |         |
| 45 and above              | 48 (31.2)                            | 671 (34.0)  |         |
| Occupation                |                                      |             |         |
| Non-farmers               | 24 (15.6)                            | 278 (14.1)  | 0.61    |
| Farmers                   | 130 (84.4)                           | 1697 (85.9) |         |
| Education                 |                                      |             |         |
| No education              | 19 (12.3)                            | 210 (10.6)  | 0.76    |
| Primary school            | 125 (81.2)                           | 1648 (83.4) |         |
| Above primary school      | 10 (6.5)                             | 117 (5.9)   |         |
| ART Line                  |                                      |             |         |
| First line <sup>a</sup>   | 150 (97.4)                           | 1960 (99.2) | 0.04    |
| Second line <sup>b</sup>  | 4 (2.6)                              | 15 (0.8)    |         |
| CD4 count, cells/ $\mu$ L |                                      |             |         |
| Below 100                 | 47 (35.1)                            | 486 (27.4)  | 0.22    |
| 100 - 199                 | 21 (15.7)                            | 369 (20.8)  |         |
| 200 - 349                 | 34 (25.4)                            | 469 (26.5)  |         |
| 350 and above             | 32 (23.9)                            | 448 (25.3)  |         |
| WHO stage                 |                                      |             |         |
| Stage 1/2                 | 68 (44.4)                            | 1003 (51.6) | 0.09    |
| Stage 3/4                 | 85 (55.6)                            | 940 (48.4)  |         |
| Tuberculosis              |                                      |             |         |
| Negative                  | 126 (83.4)                           | 1549 (80.9) | 0.45    |
| Positive                  | 25 (16.6)                            | 365 (19.1)  |         |
| Hypertension              |                                      |             |         |
| No arterial hypertension  | 123 (95.4)                           | 1774 (91.2) | 0.10    |
| Arterial hypertension     | 6 (4.7)                              | 171 (8.8)   |         |
| Anemia status             |                                      |             |         |
| No anemic                 | 37 (26.1)                            | 620 (35.4)  | 0.02    |
| Anemic                    | 105 (73.9)                           | 1132 (64.6) |         |

All participants had BMI measurement captured at ART initiation, as per the inclusion criteria for this study.

Percentages are of columns, except for the overall percentages (row percentage of all participants).

Chi-Square tests and Fisher's exact (if 25% of the cell count has frequency <5) p-values.

<sup>a</sup>First-line ART was AZT+3TC+NVP, AZT+3TC+EFV, TDF+FTC+EFV, TDF+FTC+NVP, TDF+3TC+EFV, ABC+3TC+EFV.

<sup>b</sup>Second-line ART was TDF+FTC+LPV/r, AZT+3TC+LPV/r, TDF+FTC+ATV/r.
