# Supplementary material for: Body mass index trends and its impact of under and overweight on outcome among PLHIV on antiretroviral treatment in rural Tanzania: A prospective cohort study
Source: PubMed Central journal article supplement (PMC10443839; doi:10.1371/journal.pone.0290445), 2023-08-22
Supplement: pone.0290445.s002.pdf [file pone.0290445.s002.pdf]

**S2 Table: Assessment of different change points**

| Time points (per 3 months)   | Normal weight                       |                  | Underweight                         |                  | Overweight/obese                    |              |
|------------------------------|-------------------------------------|------------------|-------------------------------------|------------------|-------------------------------------|--------------|
|                              | Estimates [95% Confidence interval] | P-value          | Estimates [95% Confidence interval] | P-value          | Estimates [95% Confidence interval] | P-value      |
| Before until 6 months        | 1.009 [1.008, 1.011]                | <.0001           | 1.023 [1.02, 1.027]                 | <.0001           | 1.005 [1.002, 1.008]                | 0.001        |
| After 6 months               | 0.999 [0.997, 1.000]                | 0.070            | 0.997 [0.995, 1.000]                | 0.023            | 1.000 [0.997, 1.003]                | 0.935        |
| Before until 7 months        | 1.008 [1.007, 1.010]                | <.0001           | 1.020 [1.017, 1.023]                | <.0001           | 1.005 [1.002, 1.008]                | 0.001        |
| After 7 months               | 0.999 [0.997, 1.000]                | 0.060            | 0.997 [0.995, 0.999]                | 0.011            | 1.000 [0.997, 1.003]                | 0.903        |
| Before until 8 months        | 1.007 [1.006, 1.009]                | <.0001           | 1.017 [1.015, 1.020]                | <.0001           | 1.004 [1.002, 1.007]                | 0.001        |
| After 8 months               | 0.998 [0.997, 1.000]                | 0.06             | 0.996 [0.994, 0.999]                | 0.006            | 1.000 [0.996, 1.003]                | 0.836        |
| <b>Before until 9 months</b> | <b>1.007 [1.005, 1.008]</b>         | <b>&lt;.0001</b> | <b>1.016 [1.013, 1.018]</b>         | <b>&lt;.0001</b> | <b>1.004 [1.002, 1.006]</b>         | <b>0.001</b> |
| <b>After 9 months</b>        | <b>0.998 [0.996, 1.000]</b>         | <b>0.047</b>     | <b>0.996 [0.993, 0.999]</b>         | <b>0.003</b>     | <b>1.000 [0.996, 1.003]</b>         | <b>0.842</b> |
| Before until 12 months       | 1.005 [1.004, 1.007]                | <.0001           | 1.012 [1.010, 1.014]                | <.0001           | 1.004 [1.002, 1.006]                | 0.001        |
| After 12 months              | 0.996 [0.994, 0.999]                | 0.005            | 0.995 [0.992, 0.998]                | 0.002            | 0.998 [0.993, 1.004]                | 0.571        |

Estimates based on an adjusted stratified linear mixed model and time modeled using piecewise regression, among patients with non-missing data at ART initiation.

Empirical standard error was used.

The BMI outcome was transformed using a natural logarithm, and the estimates should be interpreted in terms of the percent change of actual BMI.

All analyses performed for different change points were performed in multivariable models using covariates for the main analysis.
